# Supplementary material for: Identification of transcripts relating to host-parasite interactions and feeding-associated activities through de novo transcriptome sequencing of branchiuran fish lice, Argulus foliaceus (Linnaeus, 1758) and Argulus coregoni Thorell, 1865
Source: Research Square preprint supplement (doi:10.21203/rs.3.rs-285509/v1), 2021-03-17
Supplement: Supplementary file 1 [file f0e53e37a047d549071be6d4.docx]

Top 100 shared genes from10 species, used in reconstruction of *Argulus* spp phylogenetic tree (Chapter 3) relative to the position to other members of the phylum Oligostraca (Regier *et al*. 2010).

| **No.** | **Transcripts sequence identity** | **No.** | **Transcripts sequence identity** |
| --- | --- | --- | --- |
| 1 | TRINITY_DN52054_c0_g1_i1 [239-2890] | 51 | TRINITY_DN45721_c0_g1_i2 [1387-4287] |
| 2 | TRINITY_DN71251_c0_g2_i1 [3-269] | 52 | TRINITY_DN44705_c0_g3_i1 [770-4840] |
| 3 | TRINITY_DN47265_c1_g1_i1 [95-5941] | 53 | TRINITY_DN55256_c0_g1_i18 [73-2349] |
| 4 | TRINITY_DN51016_c1_g1_i1 [1075-3999] | 54 | TRINITY_DN52393_c0_g1_i2 [446-1789] |
| 5 | TRINITY_DN50550_c0_g3_i1 [2-745] | 55 | TRINITY_DN54409_c0_g1_i1 [254-1558] |
| 6 | TRINITY_DN46290_c0_g1_i1 [787-1443] | 56 | TRINITY_DN53531_c2_g1_i2 [401-2497] |
| 7 | TRINITY_DN51783_c0_g1_i14 [677-3967] | 57 | TRINITY_DN51105_c0_g1_i1 [481-3834] |
| 8 | TRINITY_DN55875_c4_g1_i1 [158-1444] | 58 | TRINITY_DN5979_c0_g1_i1 [128-1237] |
| 9 | TRINITY_DN54182_c0_g1_i1 [32-1105] | 59 | TRINITY_DN53773_c0_g1_i1 [81-2321] |
| 10 | TRINITY_DN52369_c0_g2_i1 [1-1266] | 60 | TRINITY_DN46463_c0_g1_i1 [221-1549] |
| 11 | TRINITY_DN54779_c1_g1_i1 [386-2224] | 61 | TRINITY_DN36832_c0_g1_i1 [3-2027] |
| 12 | TRINITY_DN52480_c0_g1_i4 [121-3282] | 62 | TRINITY_DN50047_c0_g1_i1 [1888-5364] |
| 13 | TRINITY_DN42468_c0_g1_i2 [21-1904] | 63 | TRINITY_DN52489_c0_g2_i1 [208-2439] |
| 14 | TRINITY_DN55874_c4_g1_i1 [2794-7461] | 64 | TRINITY_DN55950_c0_g1_i1 [252-1424] |
| 15 | TRINITY_DN51925_c0_g1_i1 [565-1965] | 65 | TRINITY_DN71626_c0_g1_i1 [166-1500] |
| 16 | TRINITY_DN49293_c0_g1_i8 [77-1909] | 66 | TRINITY_DN55590_c1_g1_i1 [1022-4360] |
| 17 | TRINITY_DN50791_c0_g1_i1 [142-1863] | 67 | TRINITY_DN39465_c0_g1_i1 [120-692] |
| 18 | TRINITY_DN1967_c0_g1_i1 [682-2022] | 68 | TRINITY_DN3223_c0_g1_i1 [95-1594] |
| 19 | TRINITY_DN56682_c0_g1_i1 [63-590] | 69 | TRINITY_DN49142_c0_g1_i1 [93-1019] |
| 20 | TRINITY_DN50671_c0_g2_i1 [120-1292] | 70 | TRINITY_DN48494_c0_g1_i1 [163-2586] |
| 21 | TRINITY_DN47110_c0_g1_i1 [161-1132] | 71 | TRINITY_DN53028_c0_g2_i14 [367-3360] |
| 22 | TRINITY_DN64912_c0_g1_i1 [3-287] | 72 | TRINITY_DN49520_c1_g2_i7 [402-2243] |
| 23 | TRINITY_DN45512_c1_g1_i4 [187-1053] | 73 | TRINITY_DN56137_c0_g2_i1 [664-6498] |
| 24 | TRINITY_DN56367_c2_g1_i3 [495-13769] | 74 | TRINITY_DN46179_c0_g1_i1 [3-314] |
| 25 | TRINITY_DN49940_c1_g1_i2 [183-2141] | 75 | TRINITY_DN48847_c0_g2_i1 [178-6699] |
| 26 | TRINITY_DN40547_c0_g1_i1 [169-2400] | 76 | TRINITY_DN49938_c0_g1_i1 [367-4320] |
| 27 | TRINITY_DN46901_c0_g1_i2 [139-1563] | 77 | TRINITY_DN50983_c0_g1_i1 [91-2001] |
| 28 | TRINITY_DN53404_c1_g1_i1 [273-1082] | 78 | TRINITY_DN52374_c0_g1_i13 [1910-4003] |
| 29 | TRINITY_DN47740_c0_g1_i5 [3-257] | 79 | TRINITY_DN53726_c1_g2_i1 [5132-6463] |
| 30 | TRINITY_DN54176_c0_g1_i2 [134-1600] | 80 | TRINITY_DN53847_c0_g1_i4 [148-2568] |
| 31 | TRINITY_DN30612_c0_g1_i2 [813-2453] | 81 | TRINITY_DN32016_c0_g2_i1 [1-1185] |
| 32 | TRINITY_DN50358_c1_g2_i1 [589-1701] | 82 | TRINITY_DN41358_c0_g1_i1 [290-1738] |
| 33 | TRINITY_DN37386_c0_g1_i1 [1396-3567] | 83 | TRINITY_DN50071_c0_g1_i2 [22-2310] |
| 34 | TRINITY_DN50459_c0_g3_i1 [31-1737] | 84 | TRINITY_DN48500_c0_g1_i1 [55-2307] |
| 35 | TRINITY_DN46401_c0_g1_i1 [951-2402] | 85 | TRINITY_DN54604_c0_g1_i1 [523-2004] |
| 36 | TRINITY_DN54578_c0_g1_i1 [1054-3798] | 86 | TRINITY_DN48880_c0_g1_i1 [117-1343] |
| 37 | TRINITY_DN53135_c1_g1_i1 [1189-3915] | 87 | TRINITY_DN55506_c3_g1_i1 [168-3701] |
| 38 | TRINITY_DN50994_c0_g1_i2 [547-2649] | 88 | TRINITY_DN50464_c0_g1_i2 [154-2460] |
| 39 | TRINITY_DN67066_c0_g1_i1 [213-1844] | 89 | TRINITY_DN55386_c0_g1_i1 [328-2028] |
| 40 | TRINITY_DN56307_c0_g1_i1 [42-3464] | 90 | TRINITY_DN49998_c1_g1_i1 [687-3188] |
| 41 | TRINITY_DN36062_c1_g1_i1 [57-515] | 91 | TRINITY_DN51117_c1_g1_i3 [3-2153] |
| 42 | TRINITY_DN58429_c0_g1_i1 [1-165] | 92 | TRINITY_DN47007_c0_g1_i3 [463-1536] |
| 43 | TRINITY_DN54398_c3_g1_i1 [2215-4107] | 93 | TRINITY_DN48272_c1_g1_i1 [2542-10239] |
| 44 | TRINITY_DN48553_c0_g1_i1 [327-3119] | 94 | TRINITY_DN52495_c1_g1_i1 [273-2717] |
| 45 | TRINITY_DN56339_c0_g1_i1 [256-2319] | 95 | TRINITY_DN48555_c0_g1_i3 [1848-4169] |
| 46 | TRINITY_DN56338_c0_g1_i1 [168-4403] | 96 | TRINITY_DN50881_c0_g3_i1 [1234-3594] |
| 47 | TRINITY_DN55321_c0_g1_i1 [192-2279] | 97 | TRINITY_DN50775_c0_g2_i1 [166-1488] |
| 48 | TRINITY_DN54273_c1_g1_i7 [92-3226] | 98 | TRINITY_DN44099_c0_g2_i1 [3-2387] |
| 49 | TRINITY_DN52152_c2_g4_i5 [2-2428] | 99 | TRINITY_DN51392_c0_g1_i1 [2-2059] |
| 50 | TRINITY_DN56211_c0_g1_i1 [341-1792] | 100 | TRINITY_DN52773_c0_g1_i2 [134-2437] |
